# Supplementary material
Source: Springer Nature journal article supplement (https://www.springermedizin.de/resource/supplementary/12916_2013_1113_MOESM4_ESM.pdf/9598510)

**a**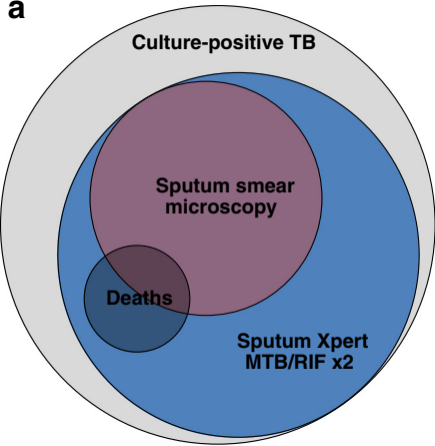**b**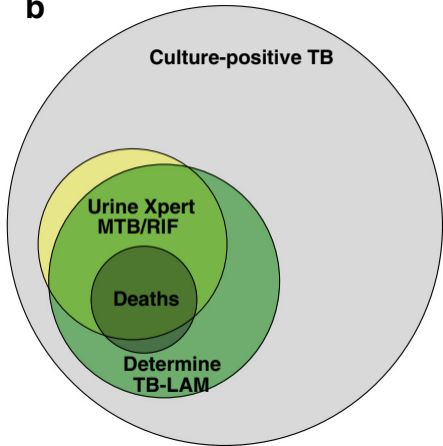

Supplement: MOESM4 [file 9598510]
